# Supplementary material for: PEGylated solid lipid nanoparticles: design, methotrexate loading and biological evaluation in animal models
Source: Royal Society of Chemistry journal article supplement (doi:10.1039/c5md00104h), 2015-01-01
Supplement: c5md00104h1.pdf [file c5md00104h1.pdf]

# SUPPLEMENTARY INFORMATION

**Table TS1(a): Mathematical equations of models used to describe drug release**

| <b>Model</b>                        | <b>Mathematical equation</b>    |
|-------------------------------------|---------------------------------|
| Zero order                          | $C = \frac{M_t}{M_f} = K_t$     |
| First Order                         | $C = \frac{M_t}{M_f} = e^{-kt}$ |
| Higuchi square root kinetics        | $\frac{M_t}{M_f} = kt^{1/2}$    |
| Korsmeyer and Peppas<br>(Power Law) | $\frac{M_t}{M_f} = kt^n$        |

**Table TS1(b): Exponent ‘n’ of power law and mechanism for drug release at different values**

| <b>N (For sphere)</b> | <b>Mechanism</b>                 |
|-----------------------|----------------------------------|
| 0.43                  | Fickian diffusion                |
| 0.43 < n < 0.85       | Anomalous transport(Non-fickian) |
| 0.85                  | Case II transport                |

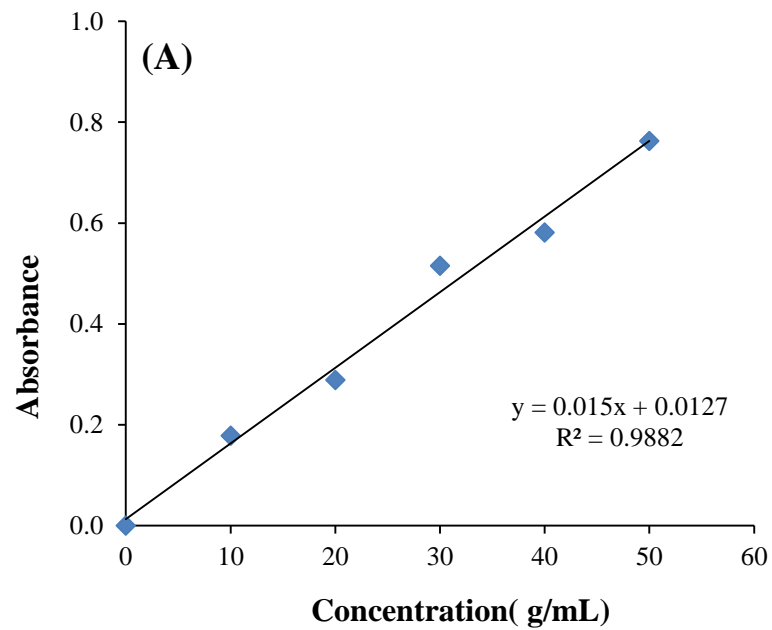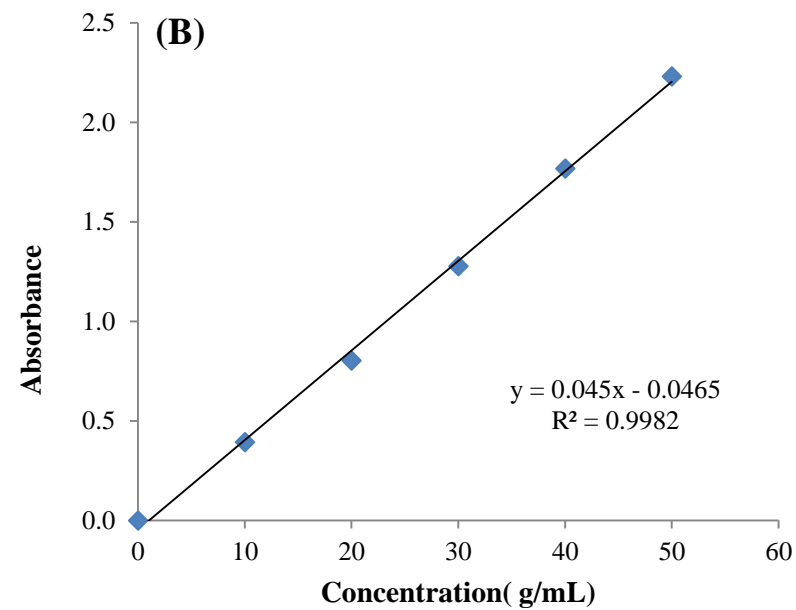

**Fig S1: Calibration curves of MTX in (A)acetate buffer(pH 5.5) and (B)phosphate buffer(pH 7.4)**

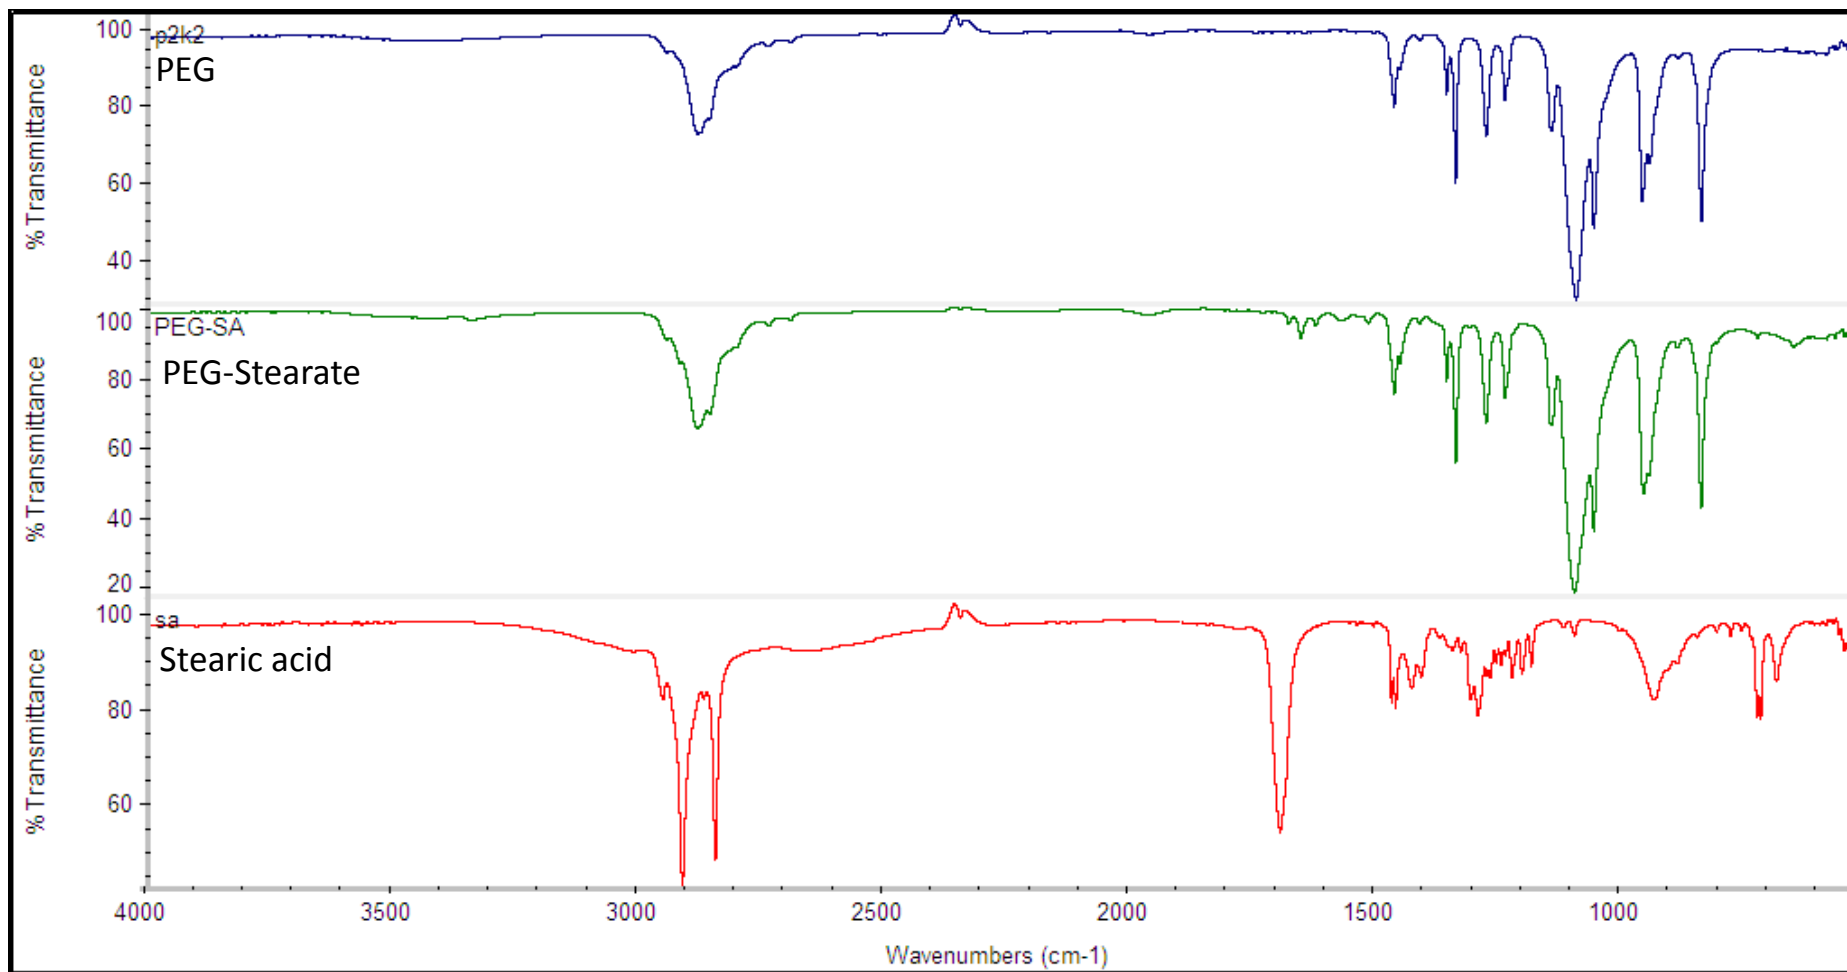

**Fig S2: FTIR spectrum of Stearic acid, PEG-OH and PEG-stearate**

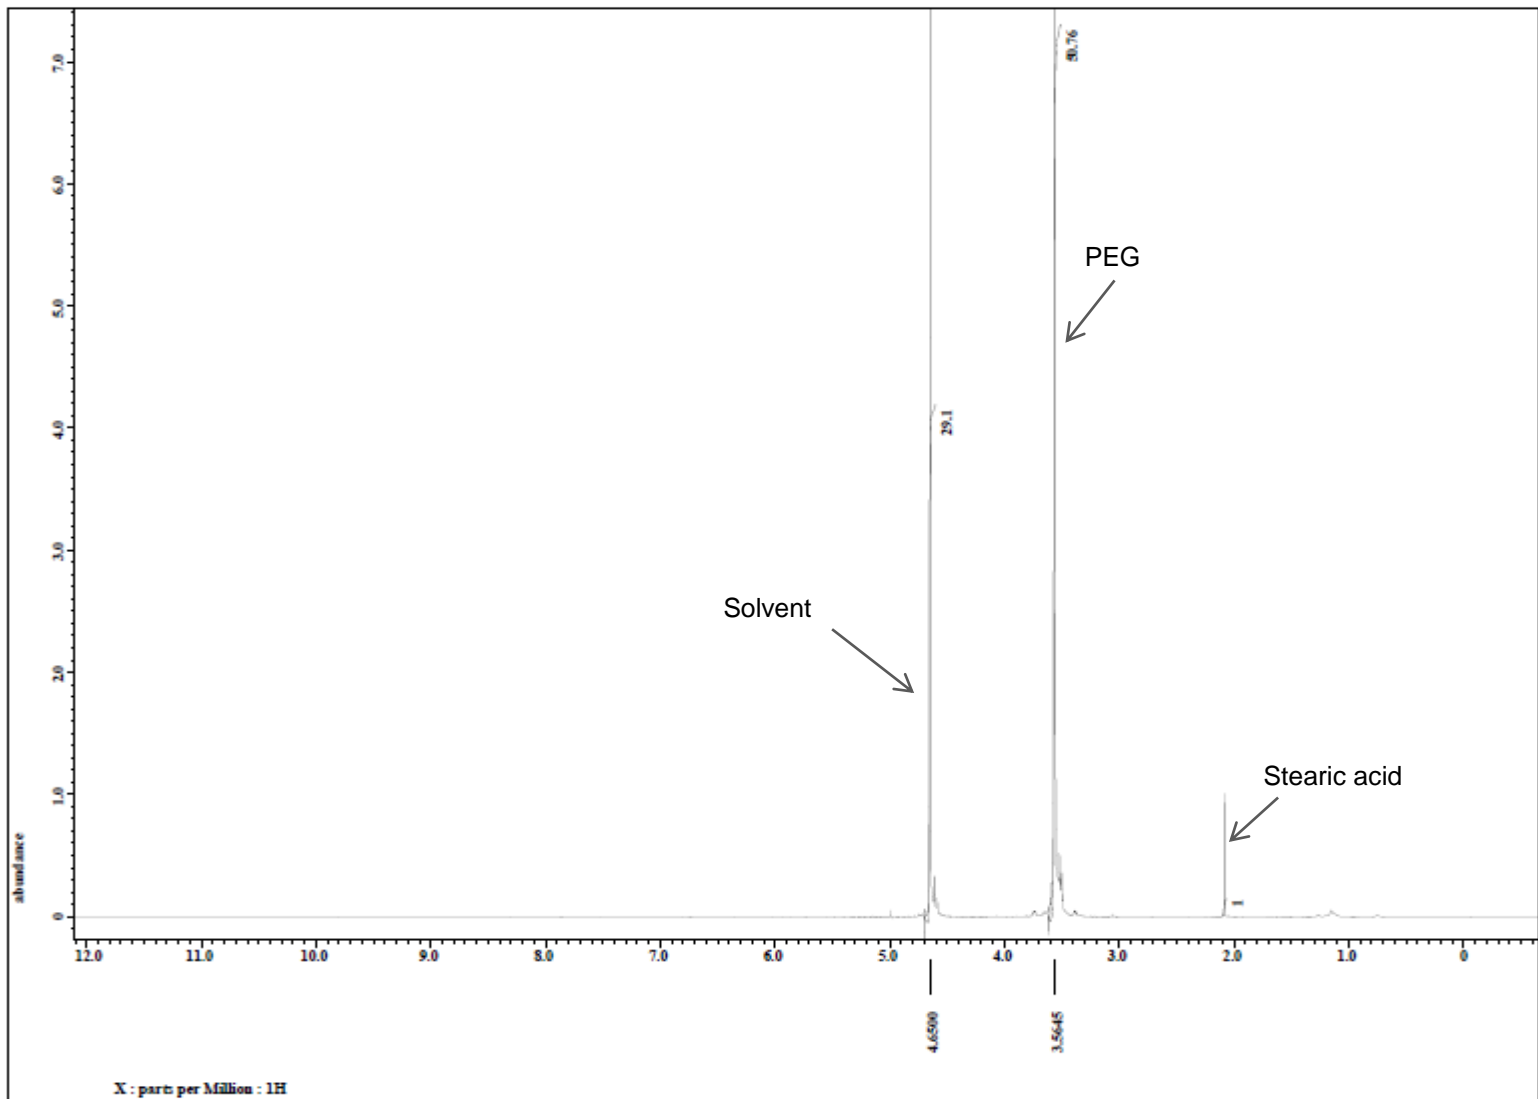

**Fig S3: NMR spectrum of PEG-stearate**

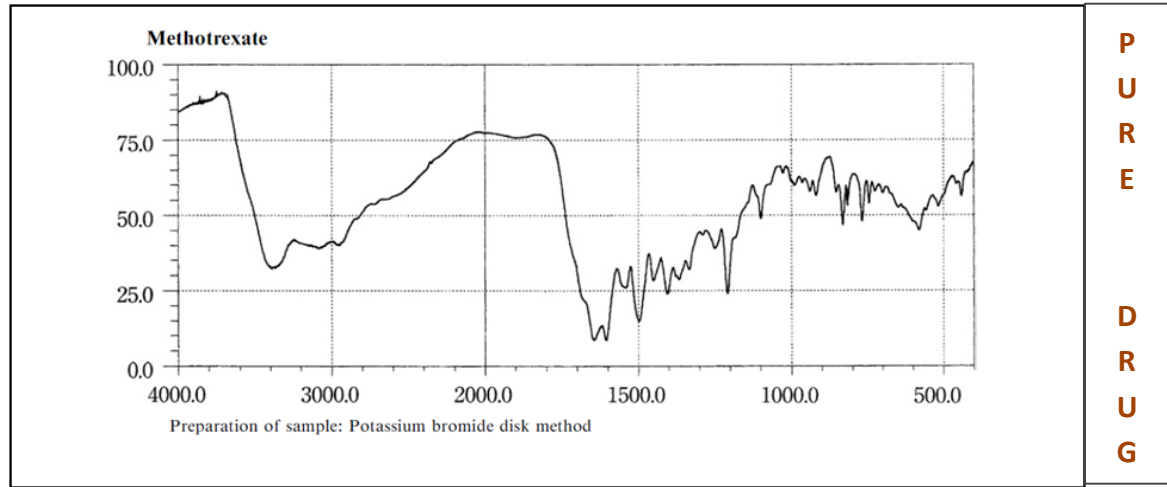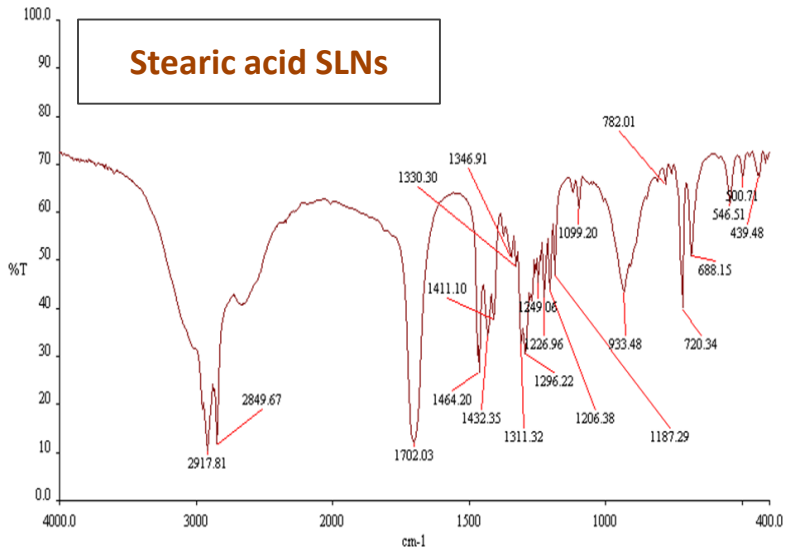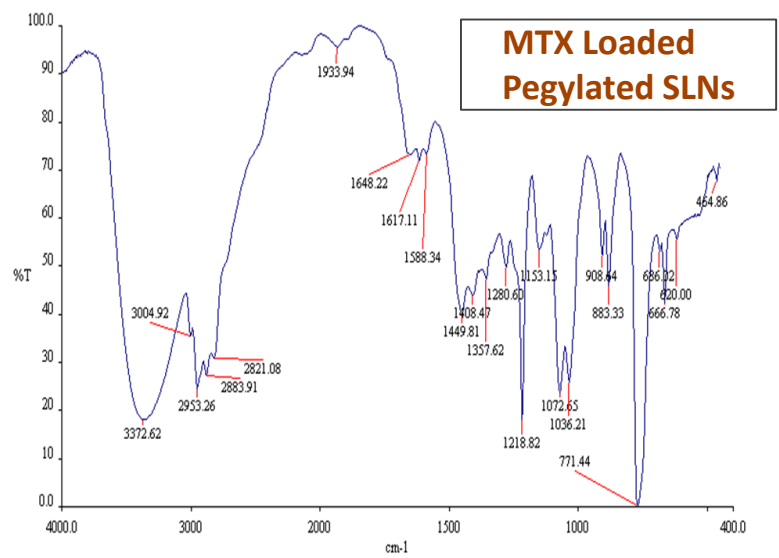

**Fig S4: FTIR spectra of MTX, MTX loaded SLNs and MTX loaded pegylated SLNs**

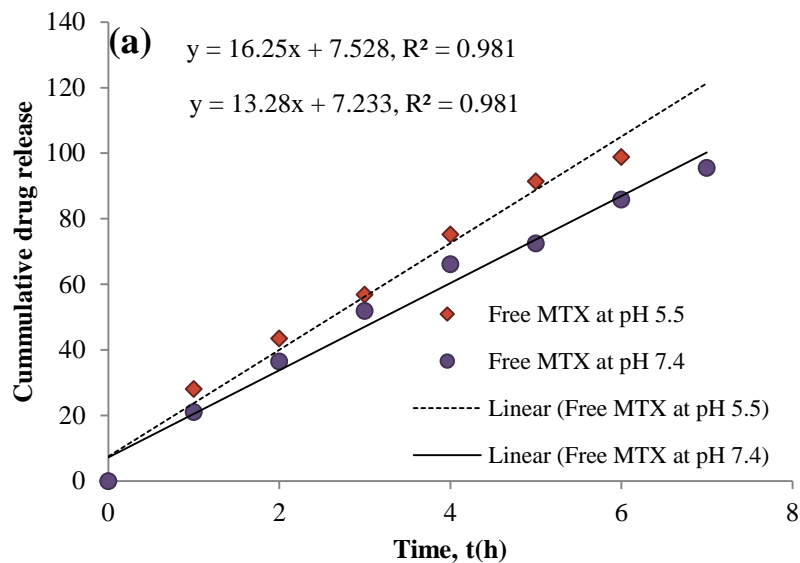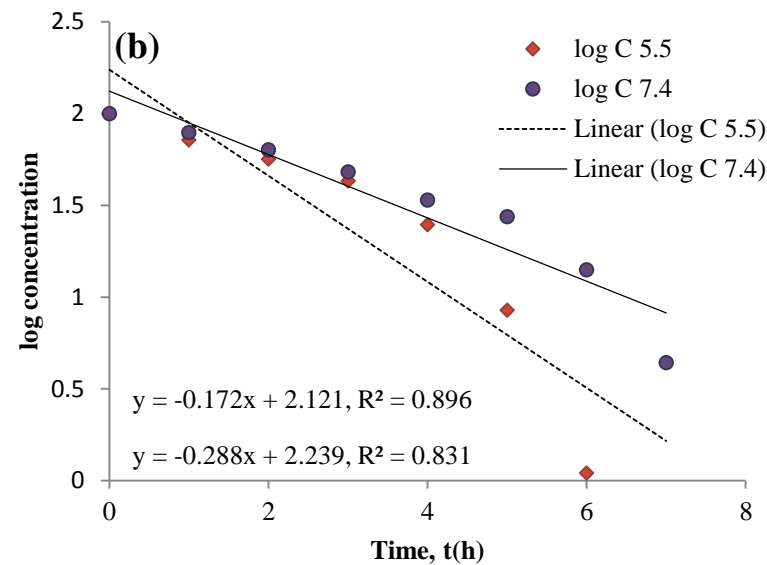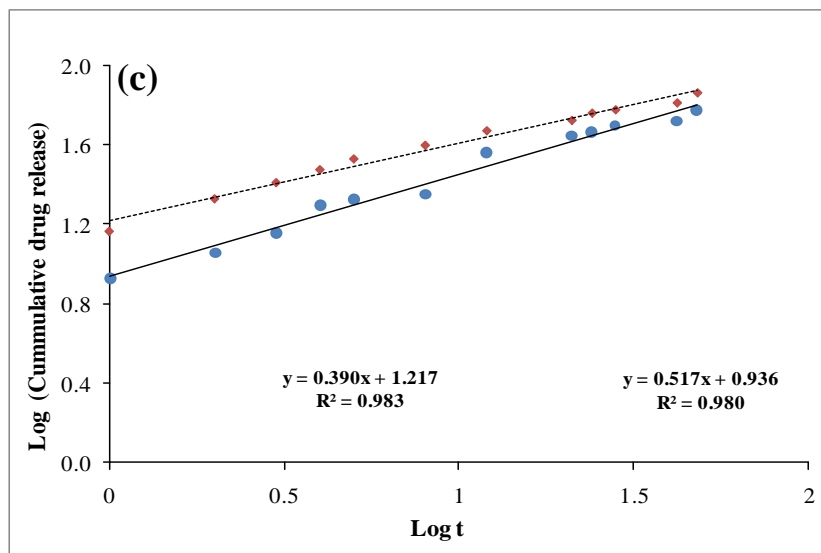

**Fig S5: In vitro Drug release profile analysis by (a)ZERO order, (b)FIRST order and (c) Korsmeyer Models at pH 5.5(red diamonds) and pH 7.4(blue dots)**

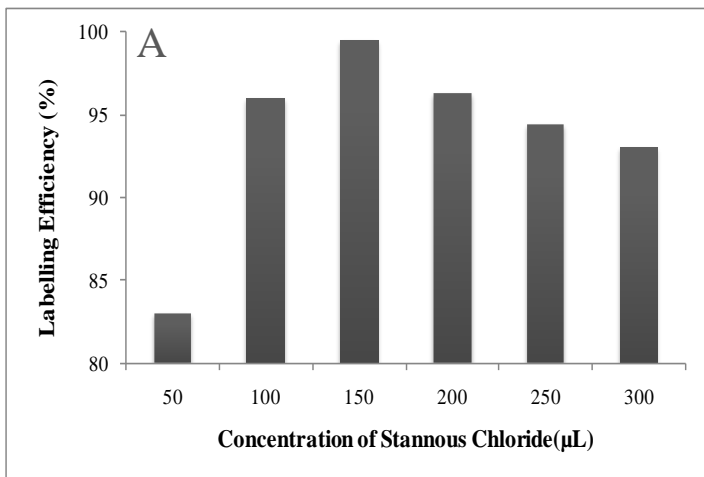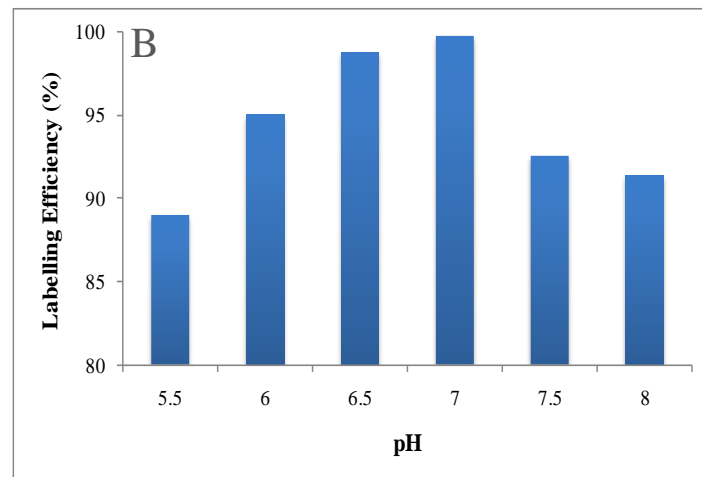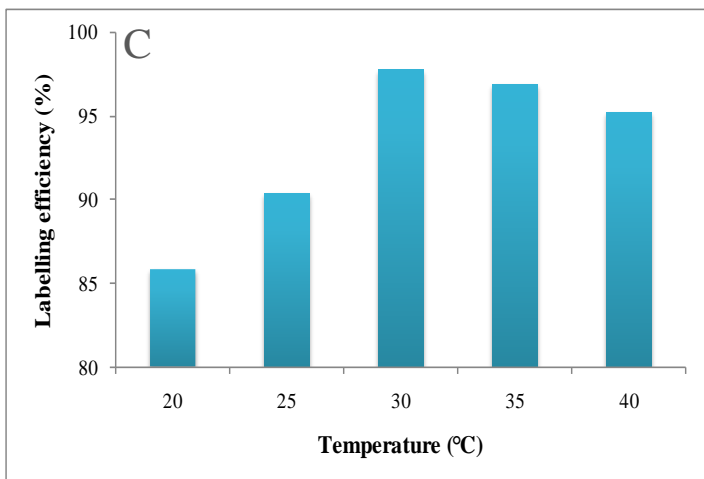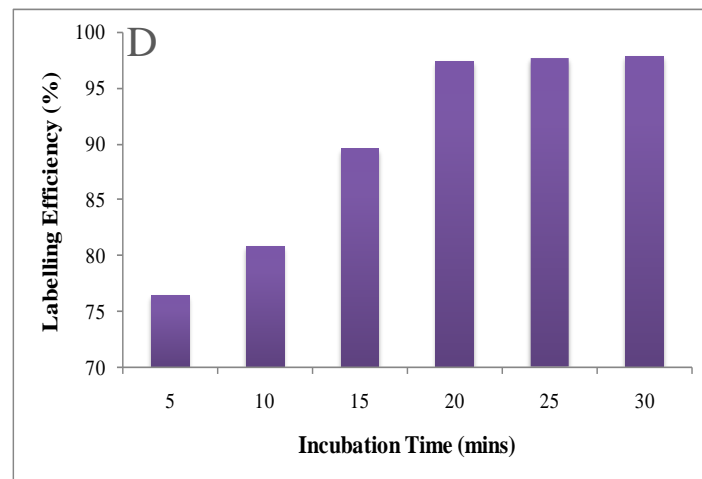

**Fig S6: Optimization of labeling parameters for the radiolabeling efficiency**

A:Effect of Stannous Chloride concentration; B:Effect of pH;

C:Effect of Temperature; D:Effect of incubation time



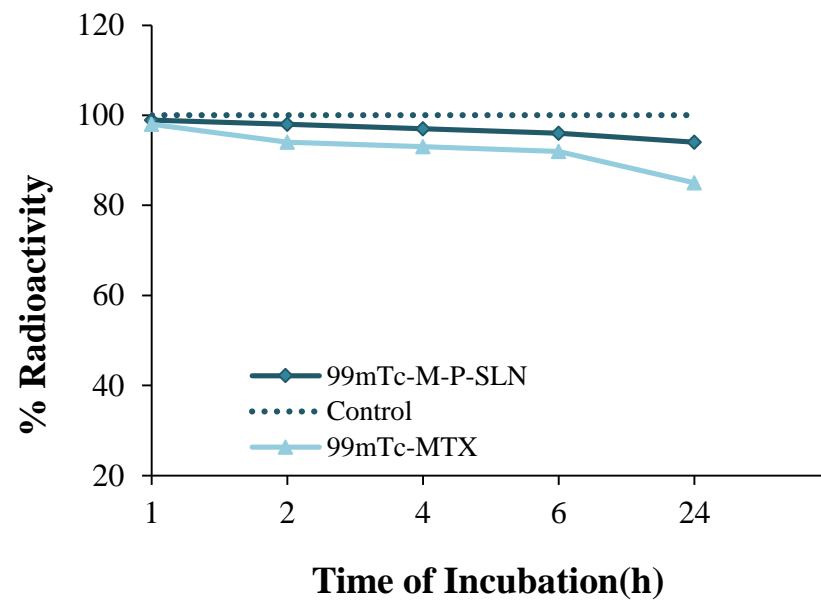

**Fig S7: In vitro human serum stability of  $^{99m}\text{Tc}$ -MTX and  $^{99m}\text{Tc}$ -M-P-SLN**
